# Supplementary material for: New insights into the effects of onion consumption on lipid mediators using a diet-induced model of hypercholesterolemia
Source: PubMed Central journal article supplement — Redox Biol. 2016 Dec 9;11:205–12. doi: 10.1016/j.redox.2016.12.002 (PMC5192248; doi:10.1016/j.redox.2016.12.002), 2016-12-09
Supplement: mmc1.pdf [file mmc1.pdf]

## Supplementary Material

**Table S1.** Nutritional composition, phytochemical compounds, and antioxidant activity of onion powder

|                                               | Onion powder     |
|-----------------------------------------------|------------------|
| Protein (g/100 g)                             | 9.75 ± 0.08      |
| Lipids (g/100 g)                              | 1.30 ± 0.06      |
| Carbohydrates (g/100 g)                       | 80.10 ± 2.89     |
| Glucose (g/100 g)                             | 27.7 ± 1.73      |
| Fructose (g/100 g)                            | 20.7 ± 0.46      |
| Sucrose (g/100 g)                             | 4.3 ± 0.11       |
| Total fructans (g/100 g)                      | 4.2 ± 0.10       |
| Total dietary fibre (g/100 g)                 | 23.2 ± 1.15      |
| Soluble fibre (g/100 g)                       | 3.2 ± 0.09       |
| Insoluble fibre (g/100 g)                     | 20.0 ± 0.17      |
| Ash (g/100 g)                                 | 4.63 ± 0.07      |
| Total phenols (mg GAE/100 g)                  | 1629.6 ± 60.0    |
| Quercetin 3-glucoside (mg/100 g)              | 32.22 ± 0.90     |
| Quercetin 4'-glucoside (mg/100 g)             | 950.00 ± 2.99    |
| Quercetin 3,4'-diglucoside (mg/100 g)         | 1368.89 ± 8.77   |
| Quercetin 7,4'-diglucoside (mg/100 g)         | 31.56 ± 0.33     |
| Quercetin 3,7,4'-triglucoside (mg/100 g)      | 9.16 ± 0.32      |
| Isorhamnetin 4'-glucoside (mg/100 g)          | 45.16 ± 1.54     |
| Isorhamnetin 3,4'-diglucoside (mg/100 g)      | 32.00 ± 0.19     |
| Total ACSOs (mg BCSOE/100 g)                  | 4120.89 ± 89.43  |
| Propionaldehyde (mg/100 g)                    | 245.04 ± 39.61   |
| 1-Propanethiol (mg/100 g)                     | 23.54 ± 0.90     |
| Hexanal (mg/100 g)                            | 0.04 ± 0.001     |
| 2-Methyl 2-pentenal (mg/100 g)                | 10.80 ± 0.67     |
| Propyl thioacetate (mg/100 g)                 | 0.45 ± 0.03      |
| Dimethyl trisulfide (mg/100 g)                | 66.41 ± 5.02     |
| Dipropyl disulfide (mg/100 g)                 | 89.45 ± 3.29     |
| Methyl propyl trisulfide (mg/100 g)           | 42.28 ± 2.14     |
| Dipropyl trisulfide (mg/100 g)                | 25.50 ± 2.45     |
| Ascorbic acid (mg/100 g)                      | 62.31 ± 0.77     |
| Total vitamin C (mg/100 g)                    | 104.26 ± 4.07    |
| Scavenging of NO <sup>•</sup> (μmol TE/100 g) | 1706.00 ± 49.61  |
| ABTS <sup>•+</sup> (μmol TE/100 g)            | 4936.67 ± 72.65  |
| DPPH <sup>•</sup> (μmol TE/100 g)             | 1135.00 ± 82.21  |
| FRAP (μmol TE/100 g)                          | 12245.14 ± 60.45 |

Values are expressed as the mean ± SD (n = 3).

GAE, gallic acid equivalents; ACSOs, *S*-alk(en)yl-L-cysteine sulfoxide; BCSOE, *S*-Butyl-L-cysteine sulfoxide equivalents; NO<sup>•</sup>, nitric oxide radical ABTS<sup>•+</sup>, 2,2'-azinobis(3-ethylbenzothiazoline-6-sulfonic acid) radical cation; DPPH<sup>•</sup>, 2,2-diphenyl-1-picrylhydrazyl radical; FRAP, ferric reducing antioxidant power; TE, trolox equivalents.

**Table S2.** Composition of the experimental diets [control (C), high-cholesterol (HC) and high-cholesterol enriched with onion (HCO)]

| Ingredient (g/kg)              | C      | HC     | HCO    |
|--------------------------------|--------|--------|--------|
| Onion powder                   | –      | –      | 100    |
| Casein                         | 200    | 200    | 200    |
| Sucrose                        | 100    | 100    | 100    |
| Maize starch                   | 470.49 | 445.49 | 368.69 |
| Soya oil                       | 50     | 50     | 50     |
| Maize oil                      | 80     | 80     | 80     |
| Mineral mixture*               | 35     | 35     | 35     |
| Vitamin mixture†               | 10     | 10     | 10     |
| Cellulose powder               | 50     | 50     | 26.8   |
| Choline bitartrate             | 2.5    | 2.5    | 2.5    |
| <i>tert</i> -butylhydroquinone | 0.010  | 0.010  | 0.010  |
| L-cystine                      | 2      | 2      | 2      |
| Cholesterol                    | –      | 20     | 20     |
| Cholic acid                    | –      | 5      | 5      |

\* Mineral mix for the AIN-93M diet, g/kg (AIN-93M-MX): calcium carbonate anhydrous, 357.00; potassium phosphate monobasic, 250.00; potassium citrate, tripotassium monohydrate, 28.00; sodium chloride, 74.00; potassium sulphate, 46.00; magnesium oxide, 24.00; ferric citrate, 6.06; zinc carbonate, 1.65; sodium meta-silicate 9H<sub>2</sub>O, 1.45; manganous carbonate, 0.63; cupric carbonate, 0.30; chromium potassium sulfate 12H<sub>2</sub>O, 0.275; boric acid, 0.0815; sodium fluoride, 0.0635; nickel carbonate, 0.0318; lithium chloride, 0.0174; sodium selenate anhydrous, 0.01025; potassium iodate, 0.0100; ammonium paramolybdate 4H<sub>2</sub>O, 0.00795; ammonium vanadate, 0.0066; powdered sucrose, 209.806.

† Vitamin mix for the AIN-93M diet, g/kg (AIN-93-VX): niacin, 3.000; calcium pantothenate, 1.600; pyridoxine-HCl, 0.700; thiamin-HCl, 0.600; riboflavin, 0.600; folic acid, 0.200; biotin, 0.200; vitamin B12 (0.1%), 2.500; vitamin E (all-*rac*- $\alpha$ -tocopheryl acetate, 500 IU/g), 15.000; vitamin A (all-*trans*-retinyl palmitate, 500,000 IU/g), 0.800; vitamin D3 (400,000 IU/g), 0.250; vitamin K1, 0.075; powdered sucrose, 974.655.

‡ Diet energy content was calculated using the factors 16.73 kJ/g (4 kcal/g) for protein, 15.69 kJ/g (3.75 kcal/g) for monosaccharides, 16.53 kJ/g (3.95 kcal/g) for disaccharides, 17.49 kJ/g (4.18 kcal/g) for starch, 8.37 kJ/g (2 kcal/g) for dietary fibre, and 37.65 kJ/g for fat. Control diet, 18540.9 kJ/kg (4431.4 kcal/kg); HC diet, 18856.6 kJ/kg (4506.8 kcal/kg); HCO diet, 18642.4 kJ/kg (4455.6 kcal/kg).

**Table S3.** List of detected compounds in the oxylipin platform with their nomenclature

| Standard     | Acronym                           | Full name                                   | Transition        | C.V. | C.E. |  |
|--------------|-----------------------------------|---------------------------------------------|-------------------|------|------|--|
| External     | PGE <sub>1</sub>                  | prostaglandin E <sub>1</sub>                | 353.30 > 317.30   | 18.0 | 14.0 |  |
|              | PGD <sub>1</sub>                  | prostaglandin D <sub>1</sub>                | 353.30 > 317.30   | 18.0 | 14.0 |  |
|              | PGE <sub>2</sub>                  | prostaglandin E <sub>2</sub>                | 351.20 > 271.10   | 22.0 | 17.0 |  |
|              | 8- <i>iso</i> -PGE <sub>2</sub>   | 8- <i>iso</i> -prostaglandin E <sub>2</sub> | 351.20 > 271.10   | 22.0 | 17.0 |  |
|              | PGD <sub>2</sub>                  | prostaglandin D <sub>2</sub>                | 351.10 > 271.10   | 17.0 | 16.0 |  |
|              | PGF <sub>2α</sub>                 | prostaglandin F <sub>2α</sub>               | 353.32 > 193.00   | 39.0 | 24.0 |  |
|              | 6-keto-PGF <sub>1α</sub>          | 6-keto-prostaglandin F <sub>1α</sub>        | 369.20 > 162.92   | 40.0 | 26.0 |  |
|              | LTB <sub>4</sub>                  | leukotriene B <sub>4</sub>                  | 335.20 > 195.00   | 32.0 | 15.0 |  |
|              | 6- <i>trans</i> -LTB <sub>4</sub> | 6- <i>trans</i> -leukotriene B <sub>4</sub> | 335.20 > 194.95   | 33.0 | 16.0 |  |
|              | LXA <sub>4</sub>                  | lipoxin A <sub>4</sub>                      | 351.30 > 115.00   | 24.0 | 15.0 |  |
|              | 5-HETE                            | 5-hydroxy-eicosatetraenoic acid             | 319.12 > 114.92   | 26.0 | 15.0 |  |
|              | 8-HETE                            | 8-hydroxy-eicosatetraenoic acid             | 319.05 > 154.85   | 26.0 | 14.0 |  |
|              | 9-HETE                            | 9-hydroxy-eicosatetraenoic acid             | 319.19 > 179.09   | 27.0 | 14.0 |  |
|              | 11-HETE                           | 11-hydroxy-eicosatetraenoic acid            | 319.00 > 166.81   | 27.0 | 15.0 |  |
|              | 12-HETE                           | 12-hydroxy-eicosatetraenoic acid            | 319.05 > 178.78   | 28.0 | 14.0 |  |
|              | 15-HETE                           | 15-hydroxy-eicosatetraenoic acid            | 319.12 > 174.81   | 26.0 | 14.0 |  |
|              | 20-HETE                           | 20-hydroxy-eicosatetraenoic acid            | 319.27 > 274.92   | 29.0 | 16.0 |  |
|              | 5-KETE                            | 5-oxo-eicosatetraenoic acid                 | 317.20 > 203.05   | 33.0 | 17.0 |  |
|              | 12-KETE                           | 5-oxo-eicosatetraenoic acid                 | 317.20 > 153.00   | 28.0 | 17.0 |  |
|              | 15-KETE                           | 15-oxo-eicosatetraenoic acid                | 317.20 > 112.90   | 30.0 | 17.0 |  |
|              | 5,6-DiHETE                        | 5,6-dihydroxy-eicosatetraenoic acid         | 335.20 > 114.90   | 25.0 | 16.0 |  |
|              | 5,15-DiHETE                       | 5,15-dihydroxy-eicosatetraenoic acid        | 335.30 > 173.00   | 24.0 | 16.0 |  |
|              |                                   |                                             | 335.30 > 255.10   |      |      |  |
|              | 14,15-DiHETE                      | 14,15-dihydroxy-eicosatetraenoic acid       | 335.20 > 207.10   | 32.0 | 17.0 |  |
|              | 17,18-DiHETE                      | 17,18-dihydroxy-eicosatetraenoic acid       | 335.20 > 247.10   | 32.0 | 17.0 |  |
|              | 5(6)-EpETrE                       | 5(6)-epoxy-eicosatrienoic acid              | 319.20 > 191.06   | 25.0 | 12.0 |  |
|              | 8(9)-EpETrE                       | 8(9)-epoxy-eicosatrienoic acid              | 319.30 > 155.00   | 26.0 | 12.0 |  |
|              | 11(12)-EpETrE                     | 11(12)-epoxy-eicosatrienoic acid            | 319.21 > 166.91   | 26.0 | 14.0 |  |
|              | 14(15)-EpETrE                     | 14(15)-epoxy-eicosatrienoic acid            | 319.30 > 219.00 - | 26.0 | 13.0 |  |
|              |                                   |                                             | 319.30 > 257.10   |      |      |  |
|              | 5,6-DiHETrE                       | 5,6-dihydroxy-eicosatrienoic acid           | 337.27 > 144.91   | 33.0 | 18.0 |  |
|              | 8,9-DiHETrE                       | 8,9-dihydroxy-eicosatrienoic acid           | 337.20 > 126.90   | 34.0 | 21.0 |  |
|              | 11,12-DiHETrE                     | 11,12-dihydroxy-eicosatrienoic acid         | 337.27 > 166.97   | 33.0 | 18.0 |  |
|              | 14,15-DiHETrE                     | 14,15-dihydroxy-eicosatrienoic acid         | 337.27 > 206.99   | 34.0 | 17.0 |  |
|              | 12-HHTrE                          | 12-hydroxy-heptadecatrienoic acid           | 279.20 > 178.90   | 27.0 | 13.0 |  |
|              | 9-HODE                            | 9-hydroxy-octadecadienoic acid              | 295.27 > 171.01   | 34.0 | 18.0 |  |
|              | 13-HODE                           | 13-hydroxy-octadecadienoic acid             | 295.20 > 195.04   | 35.0 | 17.0 |  |
|              | 9-KODE                            | 9-oxo-octadecadienoic acid                  | 293.20 > 185.00   | 44.0 | 19.0 |  |
|              | 13-KODE                           | 13-oxo-octadecadienoic acid                 | 293.20 > 112.90   | 42.0 | 20.0 |  |
|              | EKODE                             | epoxy-keto-octadecenoic acid                | 309.20 > 291.00   | 28.0 | 14.0 |  |
| 9(10)-EpOME  | 9(10)epoxy-octadecenoic acid      | 295.20 > 170.90                             | 32.0              | 16.0 |      |  |
| 12(13)-EpOME | 12(13)epoxy-octadecenoic acid     | 295.18 > 195.04                             | 30.0              | 16.0 |      |  |
| 9,10-DiHOME  | 9,10-dihydroxy-octadecenoic acid  | 313.23 > 201.10                             | 40.0              | 21.0 |      |  |

|          |                                          |                                                      |                                      |      |      |
|----------|------------------------------------------|------------------------------------------------------|--------------------------------------|------|------|
|          | 12,13-DiHOME                             | 12,13-dihydroxy-octadecenoic acid                    | 313.14 > 183.06                      | 37.0 | 21.0 |
|          | 12(13)-EpODE                             | 12(13)-epoxy-octadecadienoic acid                    | 293.20 > 183.00                      | 29.0 | 17.0 |
|          | 5-HETrE                                  | 5-hydroxy-eicosatrienoic acid                        | 321.27 > 205.06                      | 26.0 | 16.0 |
|          | 8-HETrE                                  | 8-hydroxy-eicosatrienoic acid                        | 321.30 > 157.00-<br>321.30 > 163.00  | 26.0 | 18.0 |
|          | 15-HETrE                                 | 15-hydroxy-eicosatrienoic acid                       | 321.27 > 221.08                      | 28.0 | 15.0 |
|          | 9-HOTE                                   | 9-hydroxy-octadecatrienoic acid                      | 293.20 > 170.90                      | 27.0 | 16.0 |
|          | 13-HOTE                                  | 13-hydroxy-octadecatrienoic acid                     | 293.20 > 195.20                      | 32.0 | 16.0 |
|          | 9-KOTE                                   | 9-oxo-octadecatrienoic acid                          | 291.20 > 121.00 -<br>291.20 > 185.00 | 38.0 | 20.0 |
|          | 5-HEPE                                   | 5-hydroxy-eicosapentaenoic acid                      | 317.27 > 114.84                      | 25.0 | 15.0 |
|          | 8-HEPE                                   | 8-hydroxy-eicosapentaenoic acid                      | 317.00 > 154.90                      | 25.0 | 13.0 |
|          | 11-HEPE                                  | 11-hydroxy-eicosapentaenoic acid                     | 317.04 > 166.75                      | 23.0 | 14.0 |
|          | 12-HEPE                                  | 12-hydroxy-eicosapentaenoic acid                     | 317.00 > 178.78                      | 25.0 | 13.0 |
|          | 15-HEPE                                  | 15-hydroxy-eicosapentaenoic acid                     | 317.11 > 219.05                      | 25.0 | 13.0 |
|          | 18-HEPE                                  | 18-hydroxy-eicosapentaenoic acid                     | 317.11 > 215.20                      | 25.0 | 14.0 |
|          | 14(15)-EpETE                             | 14(15)-epoxy-eicosatetraenoic acid                   | 317.30 > 207.00 -<br>317.30 > 255.10 | 24.0 | 10.0 |
|          | 17(18)-EpETE                             | 17(18)-epoxy-eicosatetraenoic acid                   | 317.30 > 215.10-<br>317.30 > 255.10  | 24.0 | 11.0 |
|          | 8-HDoHE                                  | 8-hydroxy-docosahexaenoic acid                       | 343.20 > 108.90-<br>343.20 > 189.00  | 25.0 | 13.0 |
|          | 11-HDoHE                                 | 11-hydroxy-docosahexaenoic acid                      | 343.30 > 121.00-<br>343.30 > 149.00  | 27.0 | 14.0 |
|          | 14-HDoHE                                 | 14-hydroxy-docosahexaenoic acid                      | 343.20 > 281.20                      | 26.0 | 13.0 |
|          | 17-HDoHE                                 | 17-hydroxy-docosahexaenoic acid                      | 343.20 > 281.20                      | 26.0 | 12.0 |
|          | 19(20)-EpDPE                             | 19(20)-epoxy-docosapentaenoic acid                   | 343.20 > 281.10                      | 25.0 | 12.0 |
| Internal | 5-HETE-d <sub>8</sub>                    | 5-hydroxy-eicosatetraenoic-d <sub>8</sub> acid       | 327.21 > 115.88                      | 26.0 | 15.0 |
|          | 15-HETE-d <sub>8</sub>                   | 15-hydroxy-eicosatetraenoic-d <sub>8</sub> acid      | 327.27 > 182.01                      | 27.0 | 15.0 |
|          | 20-HETE-d <sub>6</sub>                   | 20-hydroxy-eicosatetraenoic-d <sub>6</sub> acid      | 325.27 > 281.13                      | 36.0 | 17.0 |
|          | 5-KETE-d <sub>7</sub>                    | 5-oxo-eicosatetraenoic-d <sub>7</sub> acid           | 324.21 > 209.74                      | 34.0 | 18.0 |
|          | LTB <sub>4</sub> -d <sub>4</sub>         | leukotriene B <sub>4</sub> -d <sub>4</sub>           | 339.27 > 153.00                      | 35.0 | 20.0 |
|          | TXB <sub>2</sub> -d <sub>4</sub>         | thromboxane B <sub>2</sub> -d <sub>4</sub>           | 373.20 > 172.95                      | 26.0 | 15.0 |
|          | PGD <sub>2</sub> -d <sub>4</sub>         | prostaglandin D <sub>2</sub> -d <sub>4</sub>         | 355.32 > 193.10                      | 19.0 | 20.0 |
|          | PGE <sub>2</sub> -d <sub>4</sub>         | prostaglandin E <sub>2</sub> -d <sub>4</sub>         | 355.27 > 275.14                      | 29.0 | 17.0 |
|          | PGB <sub>2</sub> -d <sub>4</sub>         | prostaglandin B <sub>2</sub> -d <sub>4</sub>         | 337.23 > 179.00                      | 37.0 | 21.0 |
|          | 6-keto-PGF <sub>1a</sub> -d <sub>4</sub> | 6-keto-prostaglandin F <sub>1a</sub> -d <sub>4</sub> | 373.20 > 166.97                      | 42.0 | 25.0 |
|          | 11(12)-EpETrE-d <sub>11</sub>            | 11(12)-epoxy-eicosatrienoic -d <sub>11</sub> acid    | 330.27 > 166.89                      | 26.0 | 14.0 |
|          | 14,15-DiHETrE-d <sub>11</sub>            | 14,15-dihydroxy-eicosatrienoic-d <sub>11</sub> acid  | 348.33 > 207.05                      | 36.0 | 18.0 |
|          | 9-HODE-d <sub>4</sub>                    | 9-hydroxy-octadecadienoic-d <sub>4</sub> acid        | 299.27 > 171.97                      | 34.0 | 18.0 |
|          | 9(10)-EpOME-d <sub>4</sub>               | 9(10)epoxy-octadecenoic -d <sub>4</sub> acid         | 299.15 > 172.09                      | 30.0 | 17.0 |
|          | 9,10-DiHOME-d <sub>4</sub>               | 9,10-dihydroxy-octadecenoic -d <sub>4</sub> acid     | 317.18 > 202.93                      | 37.0 | 20.0 |

C.V.: Cone voltage; C.E.: Collision energy

**Table S4.** Basic physiological and biochemical parameters in rats fed the control (C), high-cholesterol (HC) and high-cholesterol enriched with onion (HCO) diets for 7 weeks

|                                      | C              | HC              | HCO             |
|--------------------------------------|----------------|-----------------|-----------------|
| <b><i>Food intake parameters</i></b> |                |                 |                 |
| Food intake (g/day/rat)              | 16.14 ± 0.20a  | 15.99 ± 0.18a   | 16.33 ± 0.26a   |
| Food efficiency ratio (g/g)†         | 19.56 ± 1.26a  | 18.30 ± 0.48a   | 17.46 ± 0.74a   |
| Apparent diet digestibility‡         | 92.98 ± 0.209c | 86.32 ± 0.589b  | 81.11 ± 1.780a  |
| <b><i>Growth parameters</i></b>      |                |                 |                 |
| Initial body weight (g)              | 269.08 ± 6.65a | 266.33 ± 4.96a  | 270.13 ± 7.26a  |
| Final body weight (g)                | 410.88 ± 6.13a | 400.00 ± 6.71a  | 402.13 ± 6.26a  |
| Body weight gain (g)                 | 141.80 ± 9.75a | 133.68 ± 6.93a  | 132.00 ± 9.36a  |
| <b><i>Plasma lipid profile</i></b>   |                |                 |                 |
| Total cholesterol (mg/dL)            | 83.88 ± 6.86a  | 198.25 ± 10.61b | 224.88 ± 16.02b |
| HDL-cholesterol (mg/dL)              | 60.00 ± 4.94a  | 51.50 ± 3.74a   | 61.75 ± 4.12a   |
| LDL-cholesterol (mg/dL)              | 11.88 ± 0.69a  | 118.63 ± 8.23b  | 123.50 ± 9.18b  |
| Triacylglycerols (mg/dL)             | 84.38 ± 6.69b  | 40.50 ± 3.06a   | 32.63 ± 2.60a   |
| <b><i>Relative organ weight</i></b>  |                |                 |                 |
| Heart (g/100 g body weight)          | 0.25 ± 0.016a  | 0.24 ± 0.006a   | 0.24 ± 0.008a   |
| Liver (g/100 g body weight)          | 2.83 ± 0.045a  | 5.08 ± 0.113b   | 5.45 ± 0.170b   |
| Spleen (g/100 g body weight)         | 0.17 ± 0.009a  | 0.32 ± 0.029b   | 0.27 ± 0.014b   |

Mean values with their standard error, *n* 8 per group. Mean values within a row with unlike small letters were significantly different, *P* < 0.05 (one-way ANOVA and posterior Tamhane's T2 and Bonferroni *post hoc* tests were used as appropriate, italic small letters indicate Tamhane's T2 *post hoc* test).

† 100 x (body weight gain/total food intake).

‡ 100 x (food intake – faecal weight/food intake).
